# Supplementary material for: Concanavalin A Toxicity Towards Potato Psyllid and Apoptosis Induction in Midgut Cells
Source: PubMed Central journal article supplement (PMC7240484; doi:10.3390/insects11040243), 2020-04-14
Supplement: insects-11-00243-s001.pdf [file insects-11-00243-s001.pdf]

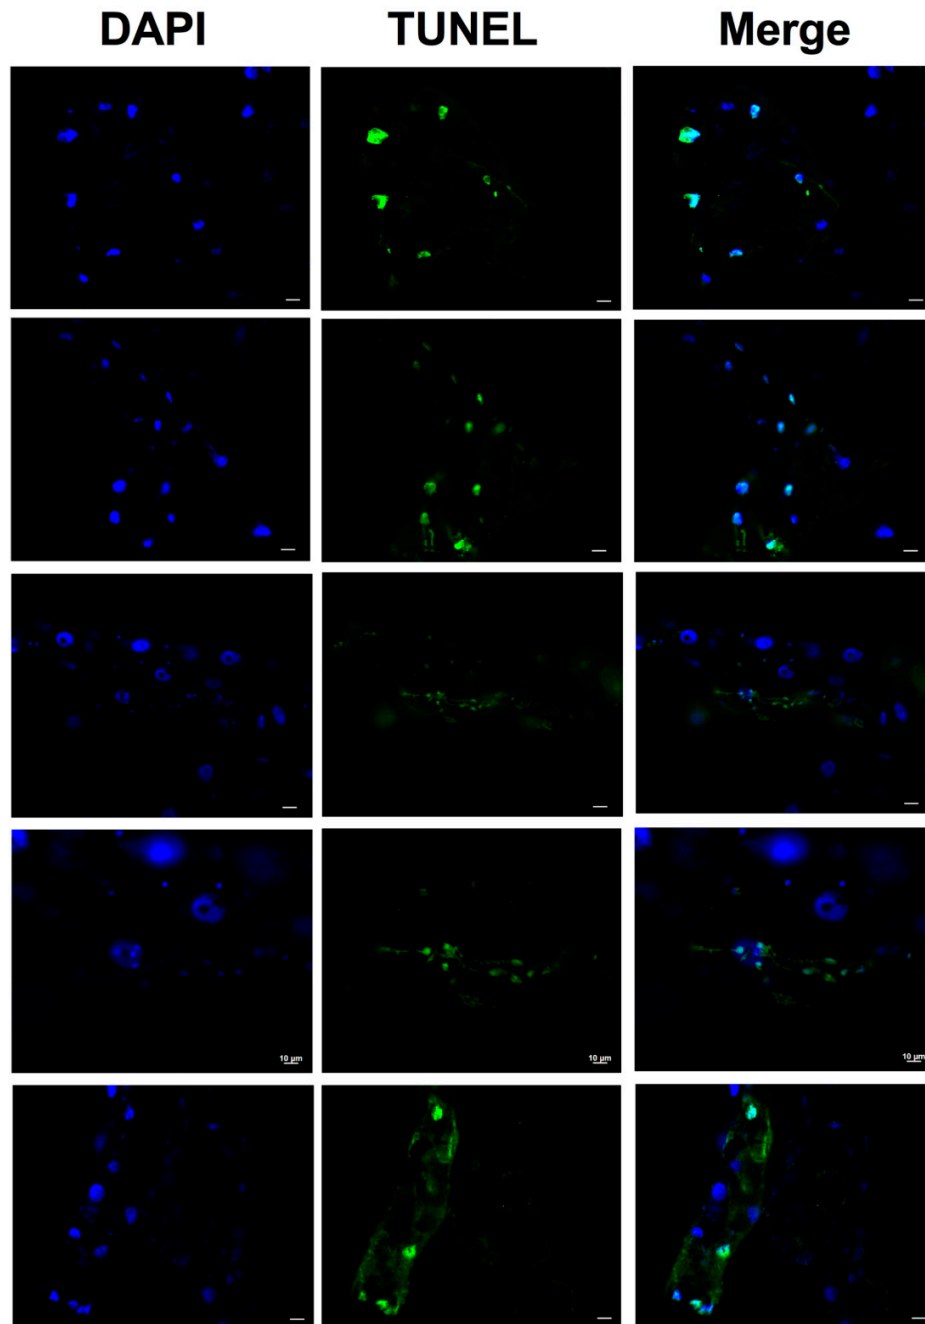

**Figure S1.** ConA induced apoptosis in the gut of Lso-free, LsoA- and LsoB-infected potato psyllid. The tissues were stained using TUNEL assays to detect the apoptotic signals (green) and counterstained with DAPI to show the nuclei (blue) of the gut cells. Scale bar is 20  $\mu$ m.

**Table S1.** Primers for bioinformatics validation and gene expression analyses by qPCR of caspase genes.

| <b>Gene Name</b>     | <b>Code</b> | <b>Primers (5'-3') for Bioinformatics Validation</b> | <b>qPCR Primers (5'-3')</b>                        |
|----------------------|-------------|------------------------------------------------------|----------------------------------------------------|
| Caspase-1 isoform X1 | Caspase1    | F: AAAATCGTCTCCAGGCTTCA<br>R: TCAGAGTGGTCAAGTTCCTTC  | F: CAAGGAGATGGTCTGGATGG<br>R: ATGAGGAAGTCAGCGTGGAG |
| Caspase-2-like       | Caspase2    | F: TTTGATGCTTTGTGGGA<br>R: AACTTGGGAATGTTGGC         | F: ATGTCCCCAGCAATGGTATC<br>R: CACAGGGTGTGACTTCTCA  |
| Caspase-3-like       | Caspase3    | F: GTAAGCAACAATACGACACC<br>R: CATAGGAGGGGATCTTGTAG   | F: AAGCTGGATGGTGGAGTACG<br>R: CAGCATAGGAGGGGATCTTG |
